# Supplementary material for: Associations of Circadian Eating Pattern and Diet Quality with Substantial Postpartum Weight Retention
Source: MDPI journal article supplement (doi:10.3390/nu11112686), 2019-11-06
Supplement: s1 [file s1]

**Table 1.** Correlations between eating patterns and covariates.

| Eating patterns      | Age    | Ethnic-Malay | Ethnic-Indian | Education-Post-sec | Education-Tertiary | Parity | Night shift | EPDS score | TEI    | BMI    | Bedtime | GDM    | GWG    | Mixed Feeding | Formula feeding |
|----------------------|--------|--------------|---------------|--------------------|--------------------|--------|-------------|------------|--------|--------|---------|--------|--------|---------------|-----------------|
| Night-eating         | -0.022 | 0.097        | 0.142         | 0.029              | 0.007              | 0.020  | -0.109      | -0.022     | -0.066 | 0.080  | -0.107  | -0.101 | 0.048  | -0.035        | -0.065          |
| Night-fasting 9-10h  | -0.106 | -0.051       | -0.184        | 0.022              | -0.022             | -0.037 | -0.003      | 0.092      | 0.071  | -0.053 | 0.215   | 0.024  | 0.032  | -0.057        | -0.079          |
| Night-fasting 11-12h | -0.092 | 0.019        | -0.082        | -0.031             | -0.078             | 0.016  | -0.038      | 0.067      | 0.079  | -0.033 | 0.253   | -0.022 | -0.068 | -0.067        | -0.082          |
| Eating episodes 4x   | 0.001  | 0.034        | -0.044        | 0.037              | -0.127             | 0.065  | 0.060       | -0.030     | -0.289 | -0.015 | 0.116   | 0.029  | -0.014 | -0.083        | -0.041          |
| Eating episodes 5x   | -0.060 | -0.012       | 0.081         | 0.053              | -0.120             | 0.030  | -0.040      | 0.016      | -0.248 | 0.051  | 0.063   | -0.026 | -0.095 | -0.046        | -0.010          |
| Eating episodes ≥6x  | -0.033 | 0.008        | -0.043        | 0.044              | -0.178             | 0.018  | 0.022       | 0.103      | -0.366 | 0.029  | 0.008   | -0.023 | -0.052 | -0.062        | -0.028          |
| Lower diet quality   | 0.050  | -0.063       | 0.030         | -0.023             | 0.084              | 0.057  | -0.027      | 0.025      | -0.231 | -0.024 | 0.079   | 0.053  | 0.037  | -0.007        | -0.081          |

Post-sec, post-secondary; EPDS, Edinburgh Postnatal Depression Scale score; TEI, total energy intake; BMI, body mass index at ≤14 weeks of gestation; GDM, gestational diabetes; GWG, gestational weight gain through 15-35 weeks of gestation.

**Table 2.** Women's baseline characteristics according to their inclusion status in the present analysis from the GUSTO study ( $n = 1026$ ).

| Variable                                           | Included ( $n = 687$ ) | Excluded ( $n = 339$ ) | $P^a$  |
|----------------------------------------------------|------------------------|------------------------|--------|
| Maternal age, years                                | $31.3 \pm 5.2$         | $29.1 \pm 5.2$         | <0.001 |
| Ethnicity, $n$ (%)                                 |                        |                        | 0.168  |
| Chinese                                            | 392 (57.1)             | 173 (51.0)             |        |
| Malay                                              | 172 (25.0)             | 100 (29.5)             |        |
| Indian                                             | 123 (17.9)             | 66 (19.5)              |        |
| Education, $n$ (%)                                 |                        |                        | 0.099  |
| None/ Primary/ Secondary                           | 243 (35.4)             | 112 (33.0)             |        |
| Post-secondary                                     | 216 (31.4)             | 129 (38.1)             |        |
| Tertiary                                           | 228 (33.2)             | 98 (28.9)              |        |
| Parity, $n$ (%)                                    |                        |                        | <0.001 |
| 0                                                  | 246 (35.8)             | 166 (49.0)             |        |
| $\geq 1$                                           | 441 (64.2)             | 173 (51.0)             |        |
| Employment status, $n$ (%)                         |                        |                        | 0.741  |
| Unemployed                                         | 227 (33.0)             | 110 (32.4)             |        |
| Employed                                           | 460 (67.0)             | 229 (67.6)             |        |
| Night shift, $n$ (%)                               |                        |                        | 0.427  |
| No                                                 | 656 (95.5)             | 327 (96.5)             |        |
| Yes                                                | 31 (4.5)               | 12 (3.5)               |        |
| Physical activity, $n$ (%)                         |                        |                        | 0.059  |
| <600 MET-min/week                                  | 223 (32.5)             | 125 (36.9)             |        |
| 600 to <3000 MET-min/week                          | 343 (49.9)             | 142 (41.9)             |        |
| $\geq 3000$ MET-min/week                           | 121 (17.6)             | 72 (21.2)              |        |
| BMI at $\leq 14$ weeks' gestation, $\text{kg/m}^2$ | $23.6 \pm 4.5$         | $23.7 \pm 5.6$         | 0.727  |
| Total EPDS score                                   | $7.4 \pm 4.5$          | $7.8 \pm 5.6$          | 0.196  |
| Sleep duration, hours                              | $7.2 \pm 1.8$          | $7.3 \pm 2.0$          | 0.191  |
| Bedtime, 24-h clock                                | $2312 \pm 0105$        | $2315 \pm 0129$        | 0.688  |
| Total energy intake, kJ/day (1 kcal=4.186 kJ)      | $7890 \pm 2358$        | $7568 \pm 3086$        | 0.074  |

Values are means  $\pm$  SDs or  $n$  (%). GUSTO, Growing Up in Singapore Towards healthy Outcomes; BMI, body mass index; EPDS, Edinburgh Postnatal Depression Scale. <sup>a</sup>Based on independent t-test for continuous variables or Fisher's exact test for categorical variables.

**Table S3.** Maternal eating patterns during pregnancy and substantial postpartum weight retention ( $\geq 5$  kg) at 18 months based on complete case analysis ( $n = 653$ ).

| Eating patterns         | Substantial PPWR $\geq 5$ kg |                          |
|-------------------------|------------------------------|--------------------------|
|                         | n                            | OR (95% CI) <sup>a</sup> |
| Day-night eating        |                              |                          |
| Day-eating              | 568                          | 1.00                     |
| Night-eating            | 85                           | 2.00 (1.04, 3.84)        |
| Night-fasting intervals |                              |                          |
| <9 hours                | 176                          | 1.00                     |
| 9–10 hours              | 253                          | 0.81 (0.45, 1.48)        |
| 11–12 hours             | 224                          | 1.17 (0.61, 2.23)        |
| Eating episodes per day |                              |                          |
| $\leq 3$ times          | 199                          | 1.00                     |
| 4 times                 | 209                          | 1.04 (0.55, 1.97)        |
| 5 times                 | 136                          | 1.13 (0.53, 2.41)        |
| $\geq 6$ times          | 109                          | 1.71 (0.72, 4.04)        |
| Diet quality            |                              |                          |
| Higher                  | 327                          | 1.00                     |
| Lower                   | 326                          | 1.80 (1.07, 3.02)        |

Analysis was performed using multivariable binary logistic regression model. All eating patterns were included in a single model and mutually adjusted to each other. PPWR, postpartum weight retention; OR, odds ratio; CI, confidence interval. <sup>a</sup> Adjusted for maternal age, ethnicity, education, parity, night shift, total Edinburgh Postnatal Depression Scale score, total energy intake and body mass index at  $\leq 14$  weeks of gestation.

**Table 4.** Effects of maternal day-night eating and diet quality on substantial postpartum weight retention ( $\geq 5$  kg) at 18 months based on complete case analysis ( $n = 653$ ).

| Eating patterns                    | Substantial PPWR $\geq 5$ kg |                          |
|------------------------------------|------------------------------|--------------------------|
|                                    | <i>n</i>                     | OR (95% CI) <sup>a</sup> |
| Day-eating + Higher diet quality   | 298                          | 1.00                     |
| Day-eating + Lower diet quality    | 270                          | 1.87 (1.07, 3.25)        |
| Night-eating + Higher diet quality | 29                           | 2.37 (0.78, 7.20)        |
| Night-eating + Lower diet quality  | 56                           | 3.43 (1.45, 8.11)        |

Analysis was performed using multivariable binary logistic regression in a single model. PPWR, postpartum weight retention; OR, odds ratio; CI, confidence interval. <sup>a</sup> Adjusted for maternal total energy intake, body mass index at  $\leq 14$  weeks of gestation, age, ethnicity, education, parity, night shift, total Edinburgh Postnatal Depression Scale score, night-fasting intervals and eating episodes per day.
